# Supplementary figures and images for: Guidelines for the Treatment of Abdominal Abscesses in Acute Diverticulitis: An Umbrella Review
Source: MDPI journal article supplement (doi:10.3390/jcm12175522), 2023-08-25

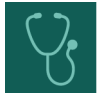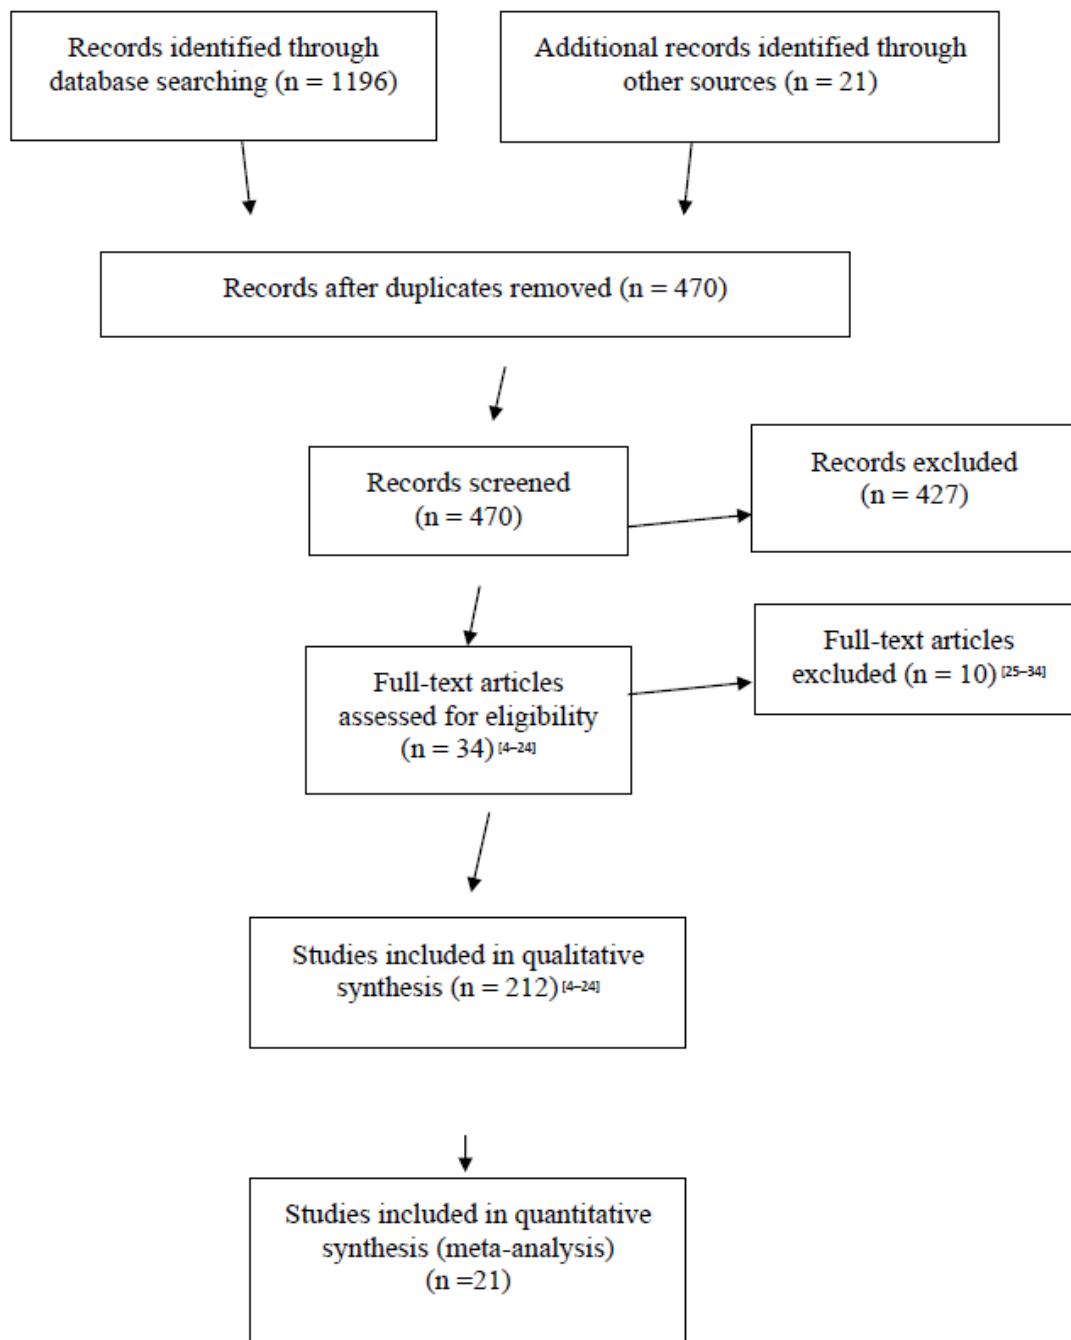

**Figure S1.** Prisma flow chart of literature search.

Supplement: s1 [file s1]
